# Supplementary material for: RNA m5C methylation orchestrates BLCA progression via macrophage reprogramming
Source: PubMed Central journal article supplement (PMC10424284; doi:10.1111/jcmm.17826), 2023-07-05

**A** DNMT3A\_ANOVA\_tests:p=6.117e-04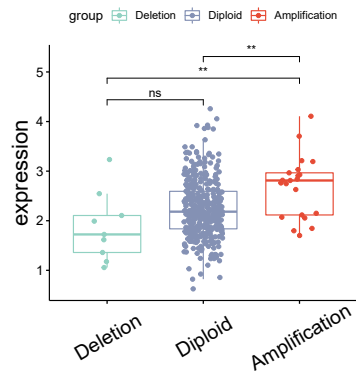**B** DNMT1\_ANOVA\_tests:p=7.621e-06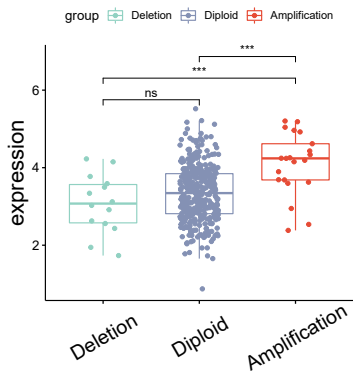**C** NSUN6\_ANOVA\_tests:p=0.003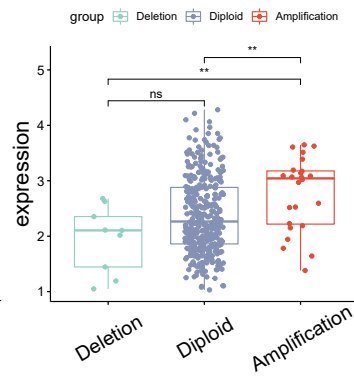**D** NSUN3\_ANOVA\_tests:p=3.151e-04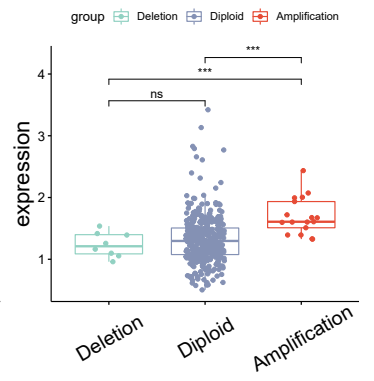**E** TET2\_ANOVA\_tests:p=0.257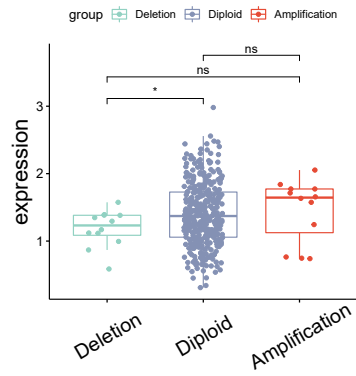**F** NSUN5\_ANOVA\_tests:p=0.249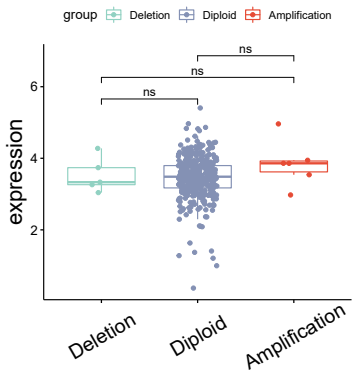**G** NSUN7\_ANOVA\_tests:p=0.579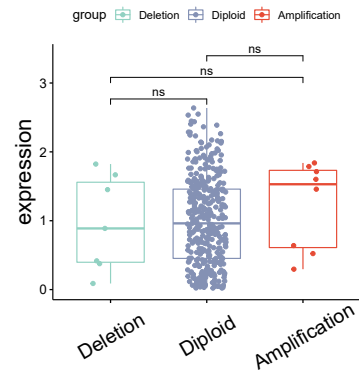

Supplement: JCMM-27-2398-s001.pdf [file JCMM-27-2398-s001.pdf]
