# Supplementary material for: RNA m5C methylation orchestrates BLCA progression via macrophage reprogramming
Source: PubMed Central journal article supplement (PMC10424284; doi:10.1111/jcmm.17826), 2023-07-05

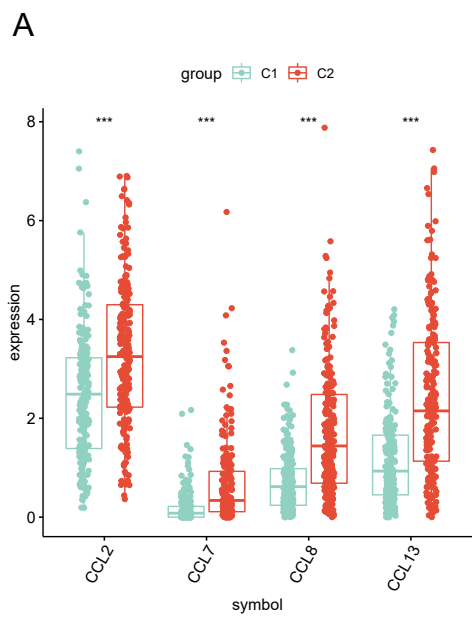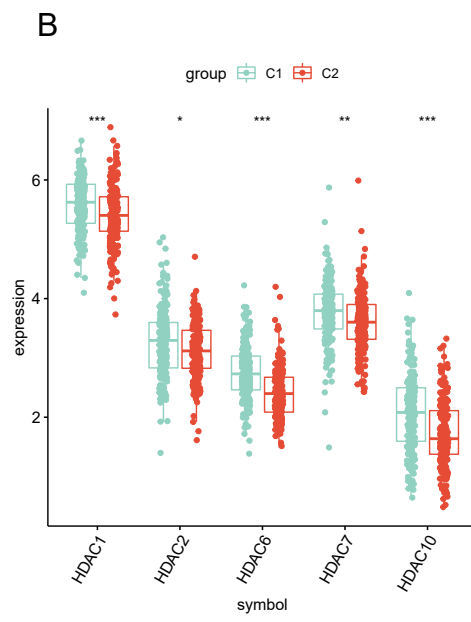

Supplement: JCMM-27-2398-s002.pdf [file JCMM-27-2398-s002.pdf]
