# Supplementary material for: RNA m5C methylation orchestrates BLCA progression via macrophage reprogramming
Source: PubMed Central journal article supplement (PMC10424284; doi:10.1111/jcmm.17826), 2023-07-05

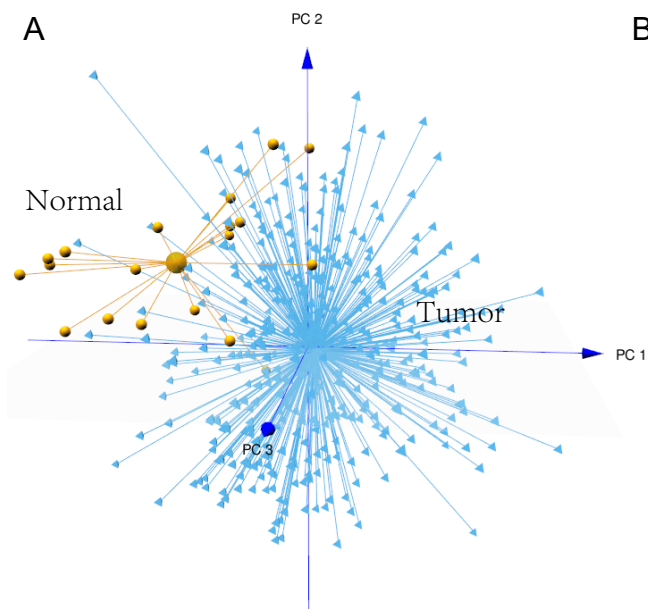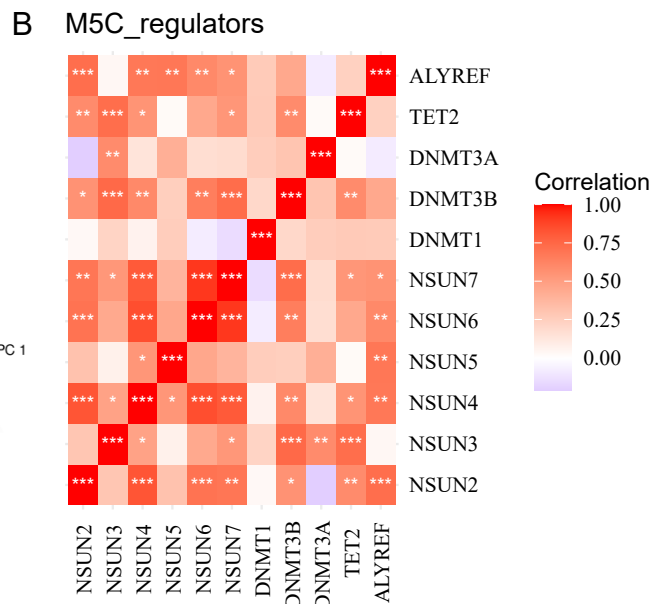

**C uniCox**

|        | pvalue | Hazard ratio       |
|--------|--------|--------------------|
| NSUN2  | 0.287  | 0.870(0.674-1.124) |
| NSUN3  | 0.880  | 1.032(0.681-1.565) |
| NSUN4  | 0.789  | 1.062(0.684-1.649) |
| NSUN5  | 0.006  | 0.712(0.557-0.909) |
| NSUN6  | 0.002  | 0.693(0.549-0.875) |
| NSUN7  | 0.087  | 0.816(0.646-1.030) |
| DNMT1  | 0.400  | 1.090(0.892-1.333) |
| DNMT3B | 0.261  | 0.910(0.772-1.073) |
| DNMT3A | 0.446  | 0.907(0.706-1.165) |
| TET2   | 0.740  | 0.945(0.679-1.316) |
| ALYREF | 0.063  | 1.272(0.987-1.639) |

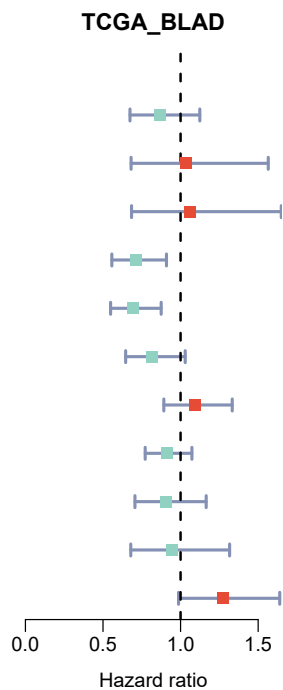

Supplement: JCMM-27-2398-s008.pdf [file JCMM-27-2398-s008.pdf]
